# Supplementary figures and images for: Electronic application to improve management of infections in low-income neonatal units: pilot implementation of the NeoTree beta app in a public sector hospital in Zimbabwe
Source: HighWire-hosted journal article supplement (doi:10.1136/bmjoq-2020-001043), 2021-01-01

Supplementary Figure 1

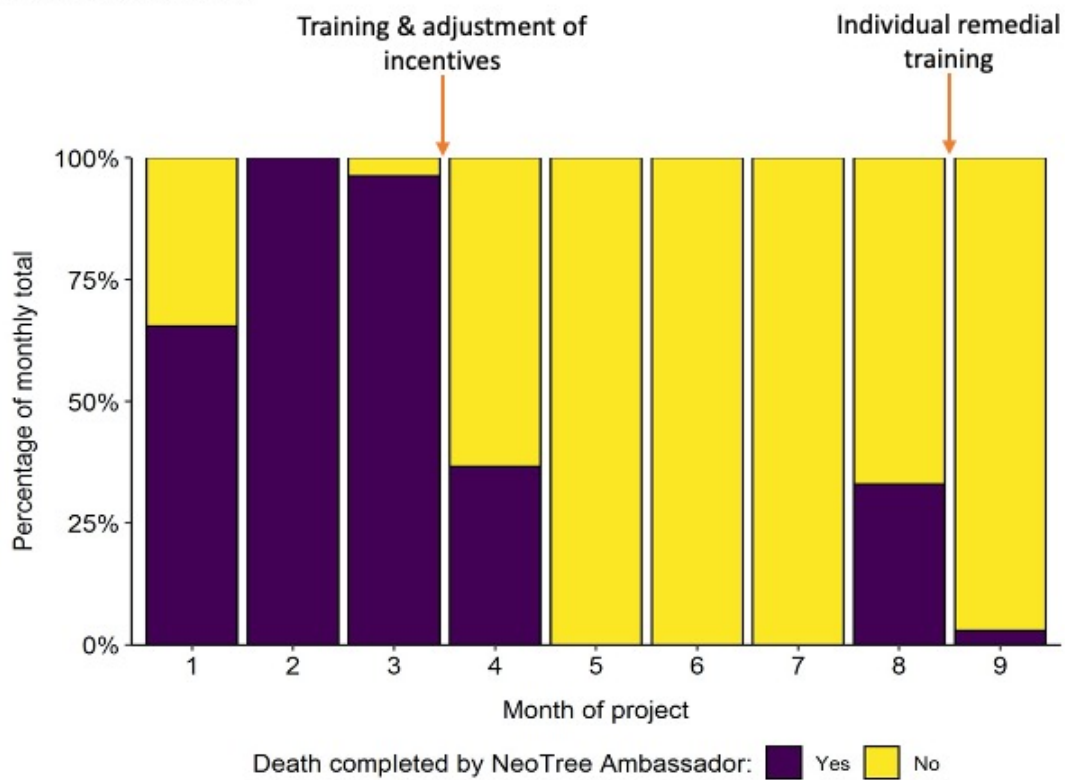

Supplement: bmjoq-2020-001043supp001_data_supplement.pdf [file bmjoq-2020-001043supp001_data_supplement.pdf]
